# Supplementary material for: Helium-induced damage in U3Si5 by first-principles studies
Source: Royal Society of Chemistry journal article supplement (doi:10.1039/d1ra04031f), 2021-01-01
Supplement: d1ra04031f1.pdf [file d1ra04031f1.pdf]

## Appendix A

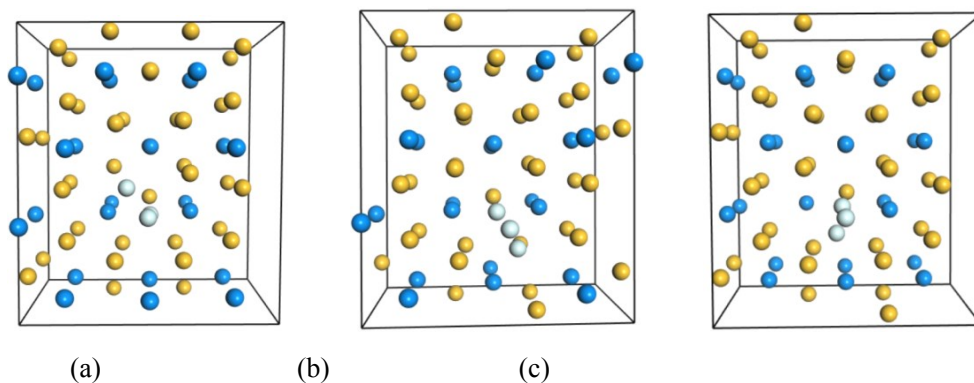

**Figure A1.** The optimized structures of the secondary defects Nearest Si<sub>1</sub> (a), Nearest Si<sub>2</sub> (b) and Nearest U (c) associated with primary Si<sub>2</sub> vacancy and 3 He atoms.

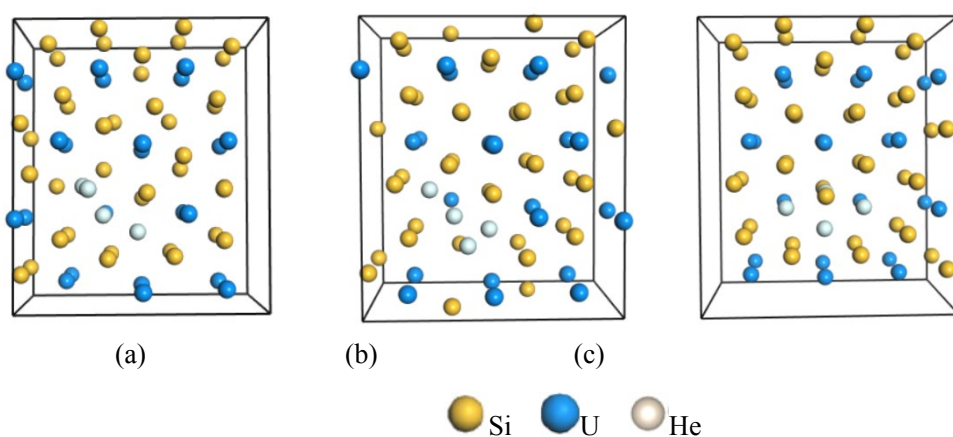

**Figure A2.** The optimized structures of the secondary defects Nearest Si<sub>1</sub> (a), Nearest Si<sub>2</sub> (b) and Nearest U (c) associated with primary U vacancy and 4 He atoms

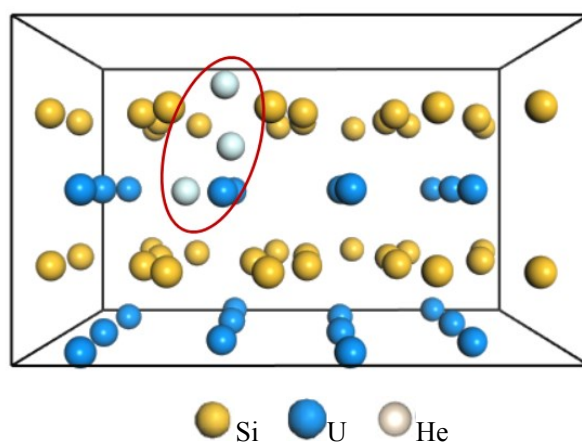

**Figure A3.** The optimized configuration of 3 He atoms trapped in Si<sub>2</sub> vacancy.

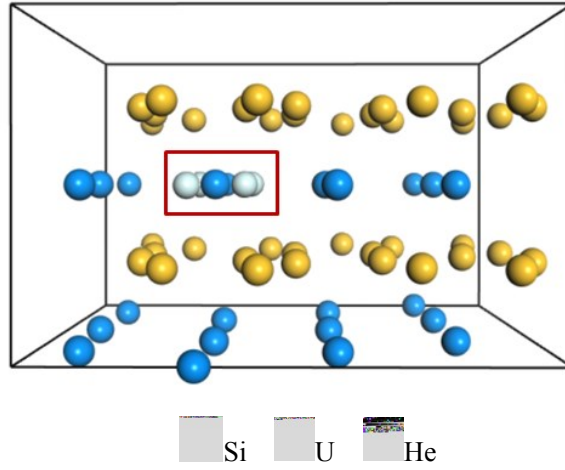

**Figure A4.** The optimized configuration of 4 He atoms trapped in U vacancy.

## Appendix A

**Tab. A1** Lattice constant change and volume change associated with the He trapping in various interstitial sites

| Structure               | $a(\text{\AA})$ | $b(\text{\AA})$ | $c(\text{\AA})$ | $V(\text{\AA}^3)$ | $\Delta a/a(\%)$ | $\Delta b/b(\%)$ | $\Delta c/c(\%)$ | $\Delta V/V(\%)$ |
|-------------------------|-----------------|-----------------|-----------------|-------------------|------------------|------------------|------------------|------------------|
| $\text{U}_3\text{Si}_5$ | 13.23           | 8.05            | 11.39           | 1213.60           | 0                | 0                | 0                | 0                |
| 1a                      | 13.25           | 8.05            | 11.42           | 1218.85           | 0.15             | 0                | 0.26             | 0.43             |
| 3g                      | 13.38           | 7.98            | 11.59           | 1237.74           | 1.13             | -0.86            | 1.70             | 1.99             |
| 2c                      | 13.11           | 8.29            | 11.31           | 1229.09           | -0.91            | 2.98             | 0.70             | 1.28             |
| 6i                      | 13.30           | 8.03            | 11.45           | 1223.89           | 0.57             | -0.25            | 0.53             | 0.85             |
